# Supplementary material for: Bone Marrow Mesenchymal Stem Cell-Derived Exosome-Educated Macrophages Promote Functional Healing After Spinal Cord Injury
Source: PubMed Central journal article supplement (PMC8506031; doi:10.3389/fncel.2021.725573), 2021-09-28
Supplement: Presentation_1.pdf [file Presentation_1.pdf]

Supplementary data

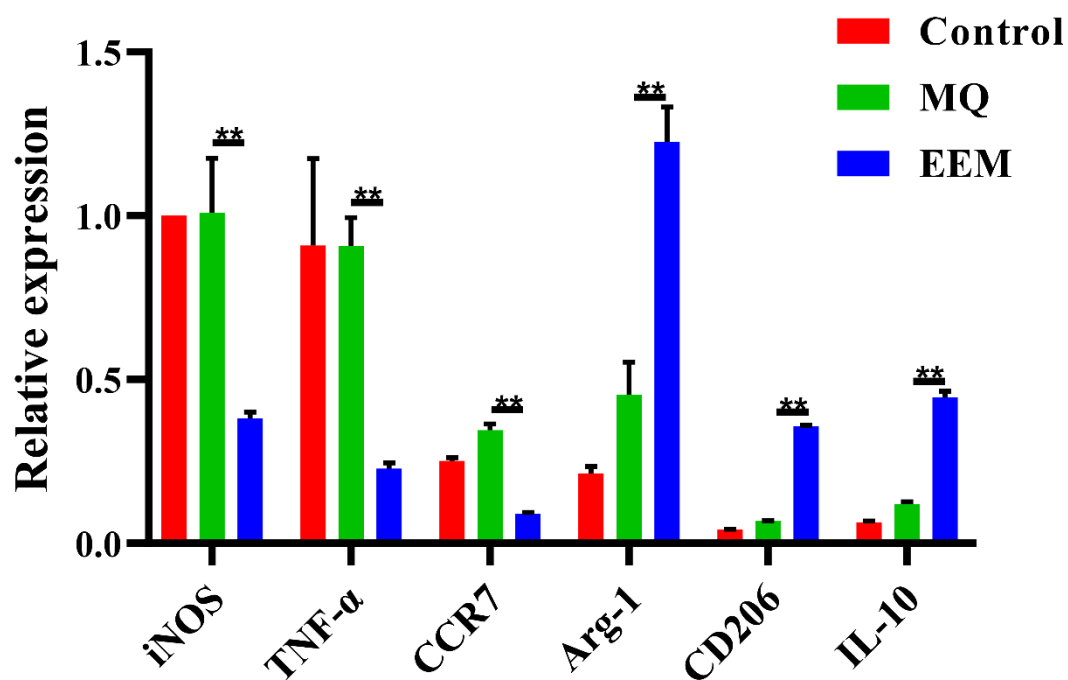

Figure S1 Expression of pro-inflammatory factors (iNOS, TNF- $\alpha$ , CCR7) and inhibitory inflammatory factors (Arg-1, CD206, IL-10) by qRT-PCR (iNOS:  $t=6.52$ ,  $p < 0.01$ ; TNF- $\alpha$ :  $t=13.35$ ,  $p < 0.01$ ; CCR7:  $t=22.78$ ,  $p < 0.01$ ; Argnase-1:  $t=9.17$ ,  $p < 0.01$ ; CD206:  $t=12.56$ ,  $p < 0.01$ ; IL-10:  $t=28.26$ ,  $p < 0.01$ ;  $n=3$  replicates for each group). The data are presented as the means  $\pm$  SD. \*\* $p < 0.01$ .
